# Supplementary material
Source: Springer Nature journal article supplement (https://www.springermedizin.de/resource/supplementary/12883_2014_1154_MOESM2_ESM.pdf/9456440)
Supplement: MOESM2 [file 9456440]

# CRP ADJUSTED SURVIVAL MODEL

## Women (55-71 years)

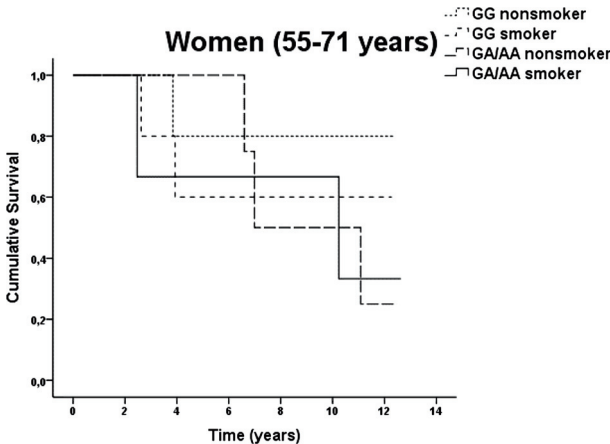

|          |   |   |   |   |   |   |   |                         |
|----------|---|---|---|---|---|---|---|-------------------------|
| Patients | 5 | 5 | 4 | 4 | 4 | 4 | 4 | FGB -455GG nonsmoker    |
| At risk  | 5 | 5 | 3 | 3 | 3 | 3 | 3 | FGB -455GG smoker       |
|          | 4 | 4 | 4 | 4 | 2 | 2 | 1 | FGB -455GA/AA nonsmoker |
|          | 3 | 3 | 2 | 2 | 2 | 2 | 1 | FGB -455GA/AA smoker    |
